# Supplementary material for: Prussian blue-coated lanthanide-doped core/shell/shell nanocrystals for NIR-II image-guided photothermal therapy
Source: Royal Society of Chemistry journal article supplement (doi:10.1039/c9nr07973d), 2019-01-01
Supplement: c9nr07973d1.pdf [file c9nr07973d1.pdf]

Supporting Information for

**Prussian Blue Coated Lanthanide-Doped Core/Shell/Shell Nanocrystals for NIR-**

**II Image-Guided Photothermal therapy**

Xin Wang, Hui Li, Feng Li, Xiaojun Han\*, and Guanying Chen\*

MIIT Key Laboratory of Critical Materials Technology for New Energy Conversion and Storage, School of Chemistry and Chemical Engineering & Key Laboratory of Micro-systems and Micro-structures, Ministry of Education, Harbin Institute of Technology, Harbin 150001, People's Republic of China

\*Correspondence: [chenguanying@hit.edu.cn](mailto:chenguanying@hit.edu.cn); [hanxiaojun@hit.edu.cn](mailto:hanxiaojun@hit.edu.cn)

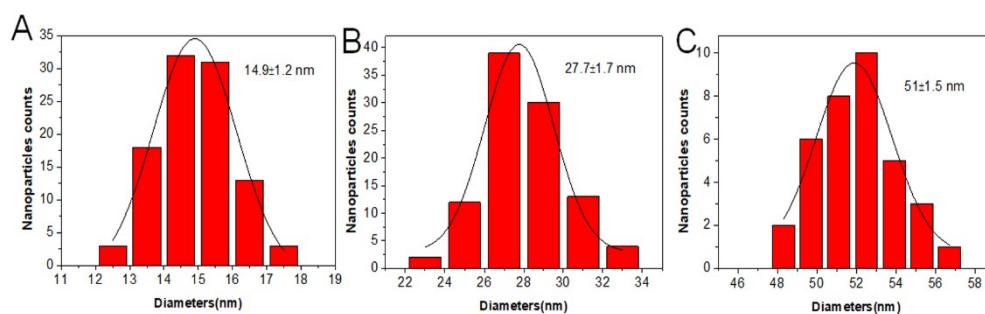

**Fig. S1.** Histograms of size distributions for (A) NaErF<sub>4</sub> core, (B) NaErF<sub>4</sub>@NaYF<sub>4</sub> core/shell and (C) NaErF<sub>4</sub>@NaYF<sub>4</sub>@NaNdF<sub>4</sub> core/shell/shell nanocrystals.

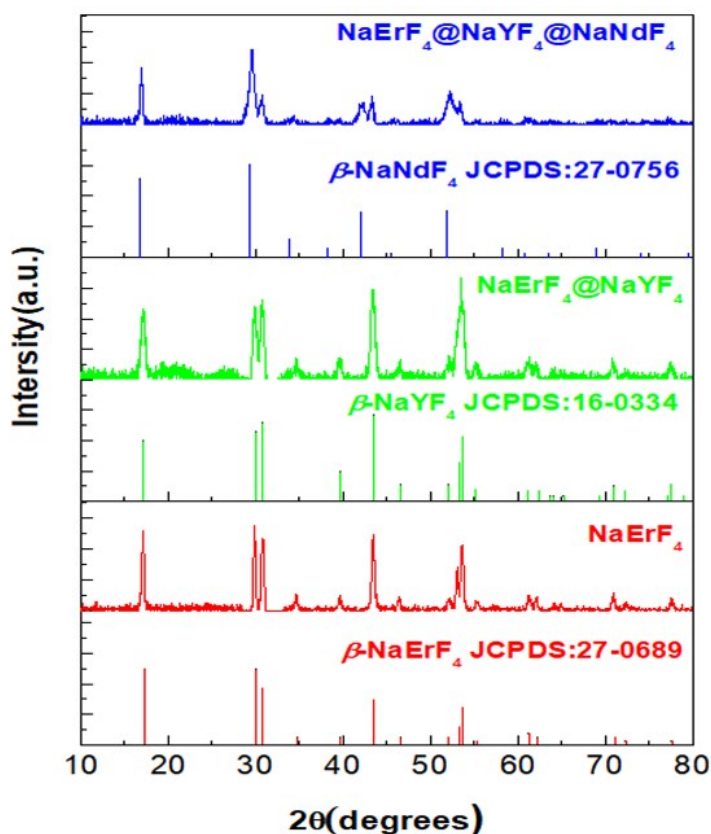

**Fig. S2.** The x-ray diffraction (XRD) patterns for the NaErF<sub>4</sub> core, NaErF<sub>4</sub>@NaYF<sub>4</sub> core/shell, and NaErF<sub>4</sub>@NaYF<sub>4</sub>@NaNdF<sub>4</sub> core/shell/shell (CSS) nanocrystals.

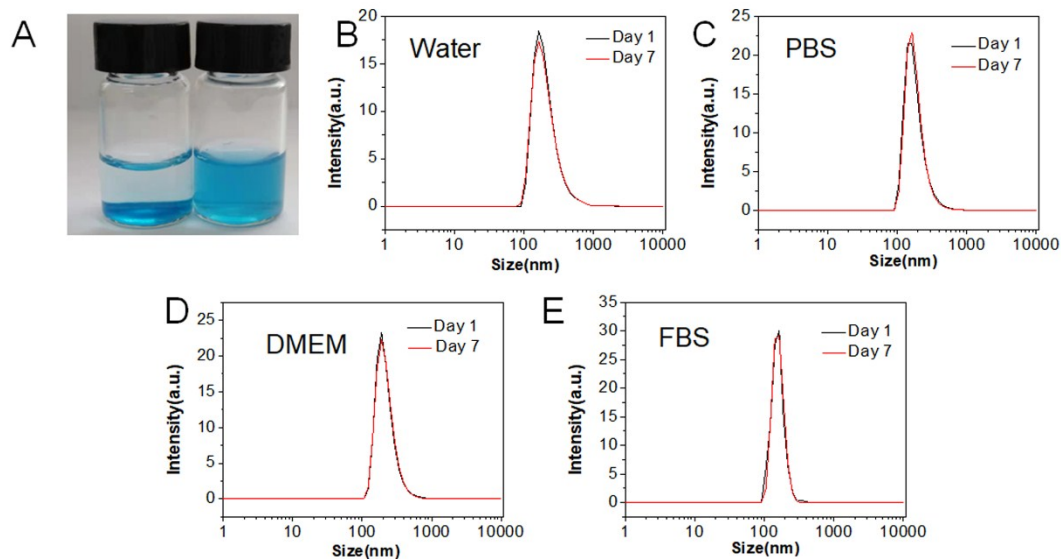

**Fig. S3.** (A) Photographic images of Prussian blue (PB)-coated  $\text{NaErF}_4@NaYF_4@NaNdF_4$  core/shell/shell (CSS@PB) (left) and PEGylated CSS@PB (PEG-CSS@PB) (right). Measured hydrodynamic sizes of PEG-CSS@PB in water (B), PBS (C), DMEM (D), and Fetal Bovine Serum (FBS) (E) at day 1 and day 7, demonstrating their distinguished colloidal stability in various aqueous media.

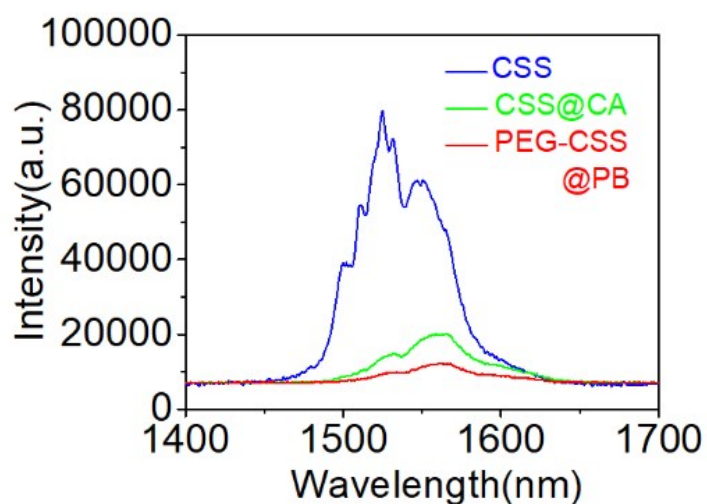

**Fig. S4** NIR II luminescence spectra (1400-1700 nm) from CSS nanocrystals, CSS@CA, and PEG-CSS@PB, under a 980 nm laser excitation.

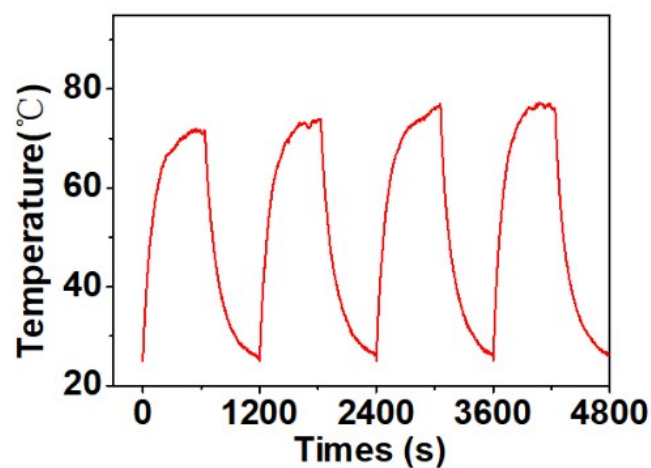

**Fig. S5.** Photothermal heating and cooling cycles of PEG-CSS@PB nanocomposites (600  $\mu\text{g}/\text{mL}$ ), excited by an 808 nm laser ( $2 \text{ W cm}^{-2}$ )

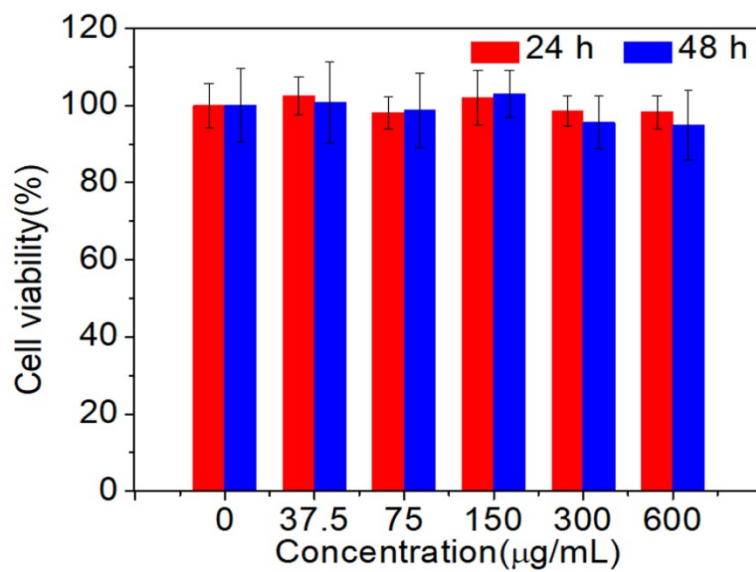

**Fig. S6.** HeLa cell viability after incubating with PEG-CSS@PB nanocomposites at different concentrations for 24 h (red) and 48 h (blue).

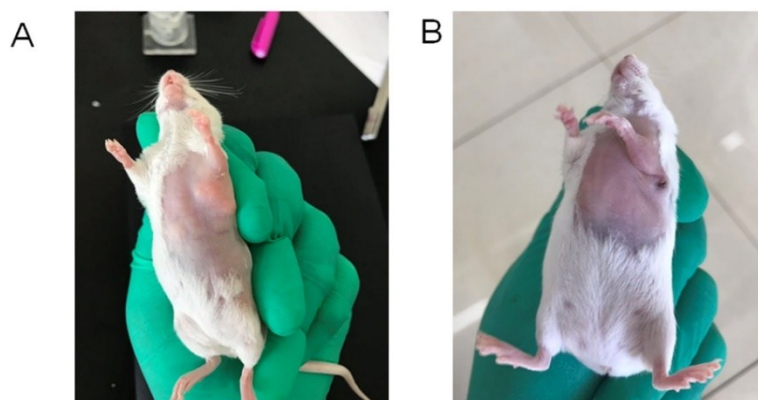

**Fig. S7** Photographic images of tumor-bearing mice (A) without and (B) with 808 nm laser irradiation, recorded 14 days post photothermal treatment with PEG-CSS@PB nanocomposites. An apparent shrinkage of tumor size is observed.

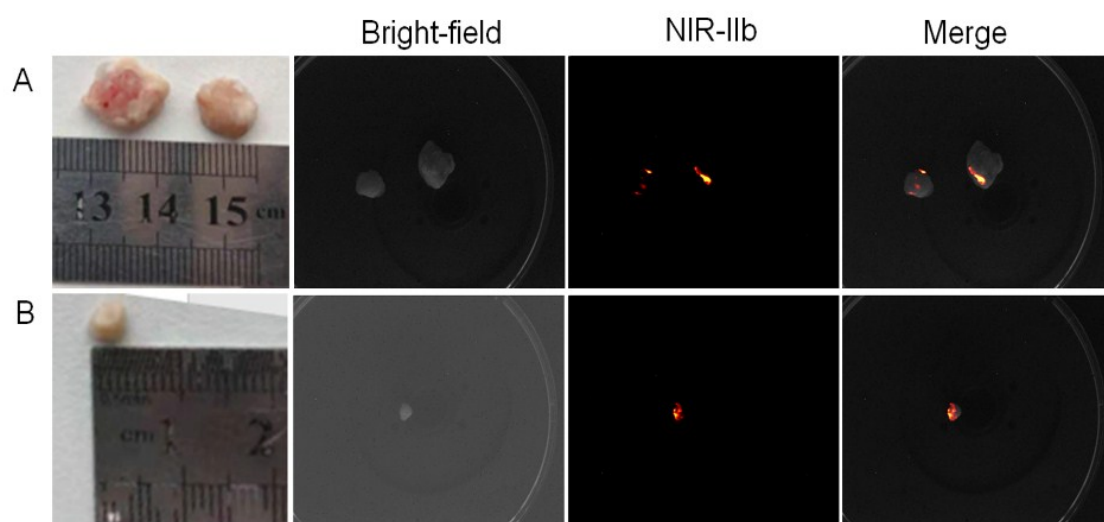

**Fig. S8** Representative optical and NIR II luminescence images of excised tumors (A) without and (B) with photothermal treatment with PEG-CSS@PB nanocomposites. These images were acquired 14 days post photothermal treatment.

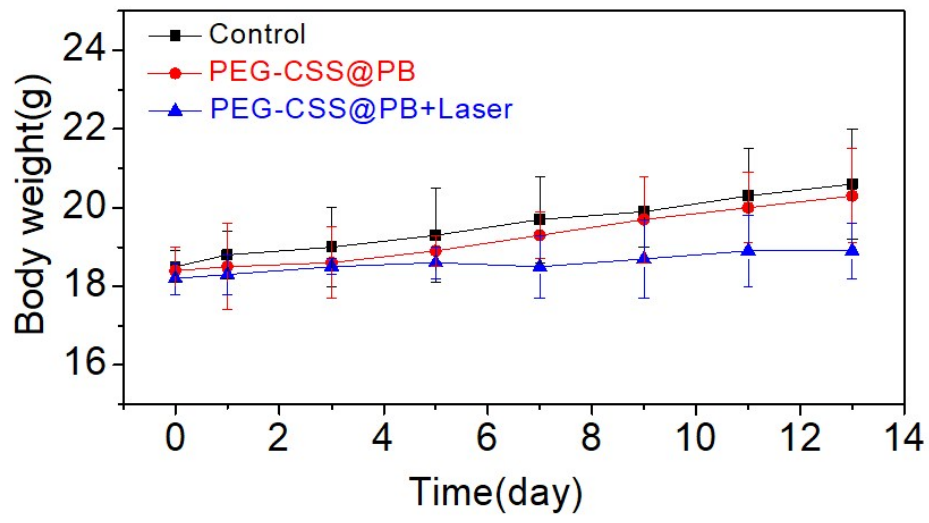

**Fig. S9** Body weight of mice in three groups, recorded at different days post administration.
